# Supplementary material for: Specifying peripheral heterochromatin during nuclear lamina reassembly
Source: PubMed Central journal article supplement — Nucleus. 2014 Feb 10;5(1):32–9. doi: 10.4161/nucl.28167 (PMC4028353; doi:10.4161/nucl.28167), 2014-02-10
Supplement: nucl-5-32-s01.pdf [file nucl-5-32-s01.pdf]

**Supplemental Material to:**

**Andrey Poleshko and Richard A Katz**

**Specifying peripheral heterochromatin during nuclear  
lamina reassembly**

**Nucleus 2013; 5(1)**

**<http://dx.doi.org/10.4161/nucl.28167>**

**<http://www.landesbioscience.com/journals/nucleus/article/28167/>**

## **Supplementary Materials**

The 3D rendering snapshots and movies were created using Imaris 7.5.0 software (Bitplane USA, South Windsor, CT). Original Z-plane images were acquired using a Leica SP8 confocal microscope.

### **Supplementary Movie S1.**

A 3D rendering of an interphase cell showing Lamin A/C (red), PRR14-GFP (green), and DAPI staining (blue). The movie illustrates colocalization of Lamin A/C, PRR14 and dense heterochromatin at the nuclear periphery and nuclear channels. This interphase cell was selected to highlight the nuclear channels.

### **Supplementary Movie S2.**

A 3D rendering of a mitotic cell in prophase showing Lamin A/C (red), PRR14-GFP (green), and DAPI staining (blue). The movie illustrates relocalization of PRR14 from the lamina structure, as well as dissociation from condensing chromatin.

### **Supplementary Movie S3.**

A 3D rendering of a mitotic cell in prometaphase showing Lamin A/C (red), PRR14-GFP (green), and DAPI staining (blue). The movie illustrates prometaphase stage, where both PRR14 and Lamin A/C remain dispersed throughout mitotic cytoplasm.

### **Supplementary Movie S4.**

A 3D rendering of a mitotic cell in anaphase showing Lamin A/C (red), PRR14-GFP (green), and DAPI staining (blue). The movie illustrates localization of PRR14 on anaphase chromatin, while Lamin A/C remains dispersed. The movie segment showing PRR14 with transparent DAPI signal, illustrates deep penetration of PRR14 into anaphase chromatin.

### **Supplementary Movie S5.**

A 3D rendering of a mitotic cell in telophase showing Lamin A/C (red), PRR14-GFP (green), and DAPI staining (blue). The movie illustrates relocalization of PRR14 to the re-formed lamina structure.
